# Supplementary material
Source: MDPI journal article supplement (https://www.mdpi.com/2075-163X/10/2/126)
Supplement: s1 [file s1]

Archive with 12 entries (11 files):
- Button.ipf
- Travel_Time_In_Phase_2.ipf
- Travel_Time_Out_Phase_2.ipf
- Ultrasonic_Data_Acquisition.py
- Ultrasonic_Data_Analysis_Manual.pdf
- __MACOSX/
- __MACOSX/._Button.ipf
- __MACOSX/._Supplementary_Information.docx
- __MACOSX/._Travel_Time_In_Phase_2.ipf
- __MACOSX/._Travel_Time_Out_Phase_2.ipf
- __MACOSX/._Ultrasonic_Data_Acquisition.py
- __MACOSX/._Ultrasonic_Data_Analysis_Manual.pdf
