# Supplementary material
Source: MDPI journal article supplement (https://www.mdpi.com/2075-163X/10/2/126)
Supplement: s1 [file s1 › Button.ipf]

#pragma rtGlobals=1		// Use modern global access method.

Function UserCursorAdjust_ContButtonProc(ctrlName) : ButtonControl
	String ctrlName
	DoWindow/K tmp_PauseforCursor				// Kill self
End
